# Supplementary material for: Effect of Supercritical Extract from Black Poplar and Basket Willow on the Quality of Natural and Probiotic Drinkable Yogurt
Source: MDPI journal article supplement (doi:10.3390/ani11102997), 2021-10-19
Supplement: s1 [file s1]

# Effect of supercritical extract from black poplar and basket willow on the quality of natural and probiotic drinkable yogurt

## SUPPLEMENTAL MATERIAL

**Marcin Walter<sup>1</sup>, Bartosz Brzozowski<sup>1,\*</sup> and Marek Adamczak<sup>1</sup>**

<sup>1</sup> Department of Process Engineering, Equipment and Food Biotechnology, Faculty of Food Science, University of Warmia and Mazury in Olsztyn, Jan Heweliusz St. 1, 10-718 Olsztyn, Poland;

bartosz.brzozowski@uwm.edu.pl (B.B.); marek.adamczak@uwm.edu.pl (M.A.); marcin.walter@uwm.edu.pl (M.W.)

\* Correspondence: bartosz.brzozowski@uwm.edu.pl; Phone: +48-89523-36-50 (B.B.)

### *Chemicals*

The following chemical reagents were used in the experiments: methanol (≥99%, Stanlab, Lublin, Poland), Folin–Ciocalteu reagent (Aktyn, Suchy Las, Poland), sodium carbonate (≥99%, Stanlab), sodium hydroxide (≥99%, Stanlab), sodium chloride (≥99%, Stanlab), gallic acid (≥98%, Sigma Aldrich, Poznan, Poland), 2,2-diphenyl-1-picrylhydrazyl, (DPPH, Sigma Aldrich), quercetin (≥95% Sigma Aldrich) and 6-hydroxy-2,5,7,8-tetramethylchromane-2-carboxylic acid (Trolox, ≥98%, Sigma Aldrich).
